# Supplementary material for: Real-Time Sequence-Validated Loop-Mediated Isothermal Amplification Assays for Detection of Middle East Respiratory Syndrome Coronavirus (MERS-CoV)
Source: PubMed Central journal article supplement (PMC4391951; doi:10.1371/journal.pone.0123126), 2015-04-09
Supplement: pone.0123126.s001.pdf [file pone.0123126.s001.pdf]

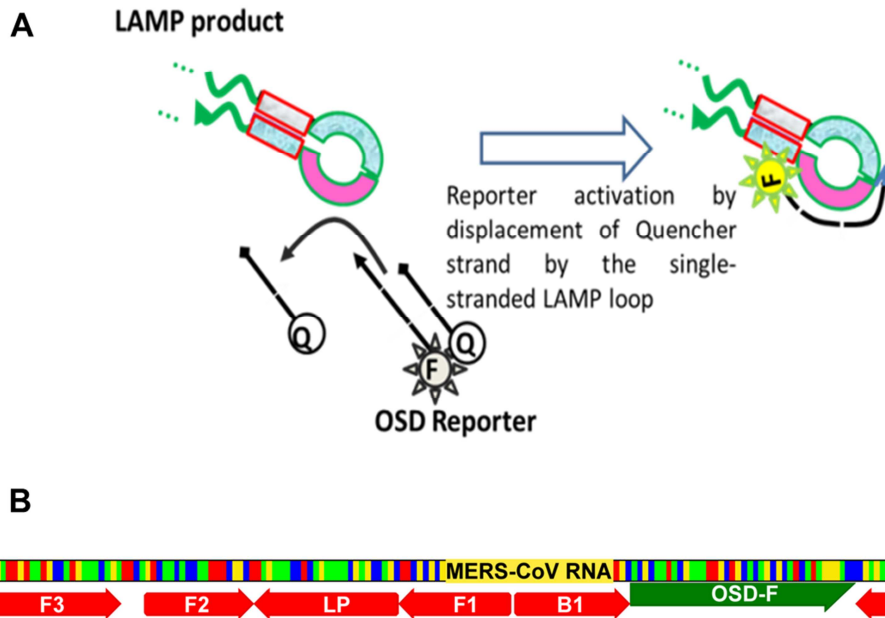

**Supplementary Figure S1.** Design and operation of real-time asymmetric five-primer OSD-LAMP. **A.** Schematic of fluorescent one-step strand displacement probes (OSD) for real-time sequence-specific signal transduction of LAMP. **B.** Schematic depicting positions of the OSD probe and the loop primer (LP) on the opposing loops of LAMP amplicons generated from MERS-CoV RNA.
