# Supplementary material for: Real-Time Sequence-Validated Loop-Mediated Isothermal Amplification Assays for Detection of Middle East Respiratory Syndrome Coronavirus (MERS-CoV)
Source: PubMed Central journal article supplement (PMC4391951; doi:10.1371/journal.pone.0123126), 2015-04-09
Supplement: pone.0123126.s003.pdf [file pone.0123126.s003.pdf]

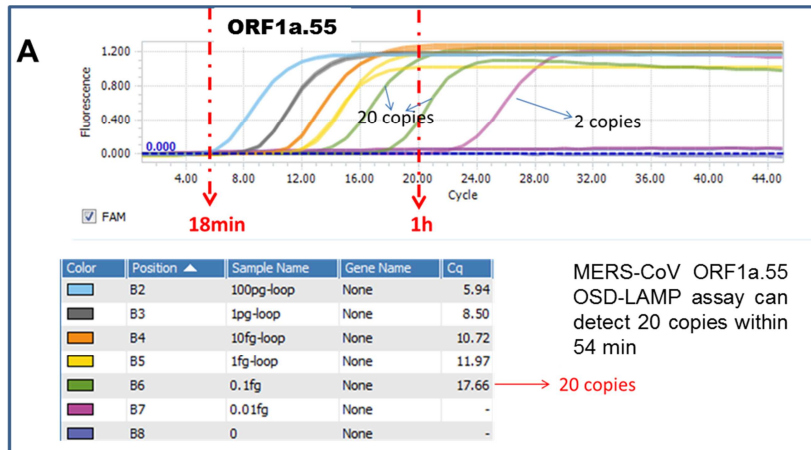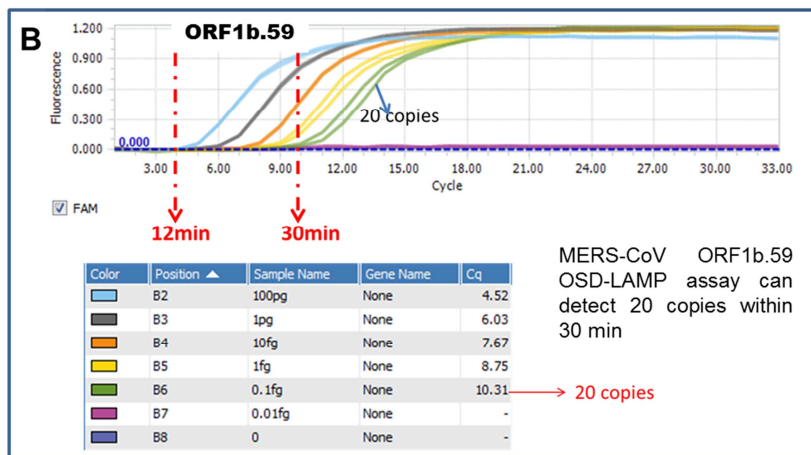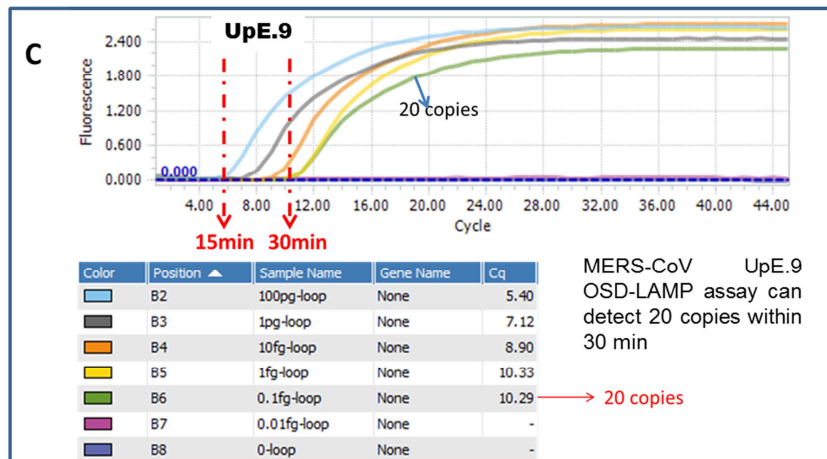

**Supplementary Figure S3.** Limit of detection of asymmetric five-primer OSD-LAMP assays for detection of plasmids containing cloned DNA surrogates of MERS-CoV genomic targets located in ORF1a and ORF1b and in the region upstream of the gene E. OSD-LAMP reactions were performed at 65 °C with 3 min incubations per cycle. The Cq of each amplification reaction as calculated by the LightCycler 96 software is tabulated.
