# Supplementary material for: Real-Time Sequence-Validated Loop-Mediated Isothermal Amplification Assays for Detection of Middle East Respiratory Syndrome Coronavirus (MERS-CoV)
Source: PLoS One. 2015 Apr 9;10(4):e0123126. doi: 10.1371/journal.pone.0123126 (PMC4391951; doi:10.1371/journal.pone.0123126)
Supplement: S4 Fig — The primer set ORF1a.55 was used for optimizing the RT-LAMP-mediated amplification of 9 x 108 copies of DNase I-treated synthetic ORF1a RNA. RT-LAMP reactions were performed at 65 °C with 3 min incubations per cycle on a LightCycler 96. Amplicon accumulation was measured in real-time as increase in fluorescence of EvaGreen. (PDF) [file pone.0123126.s004.pdf]

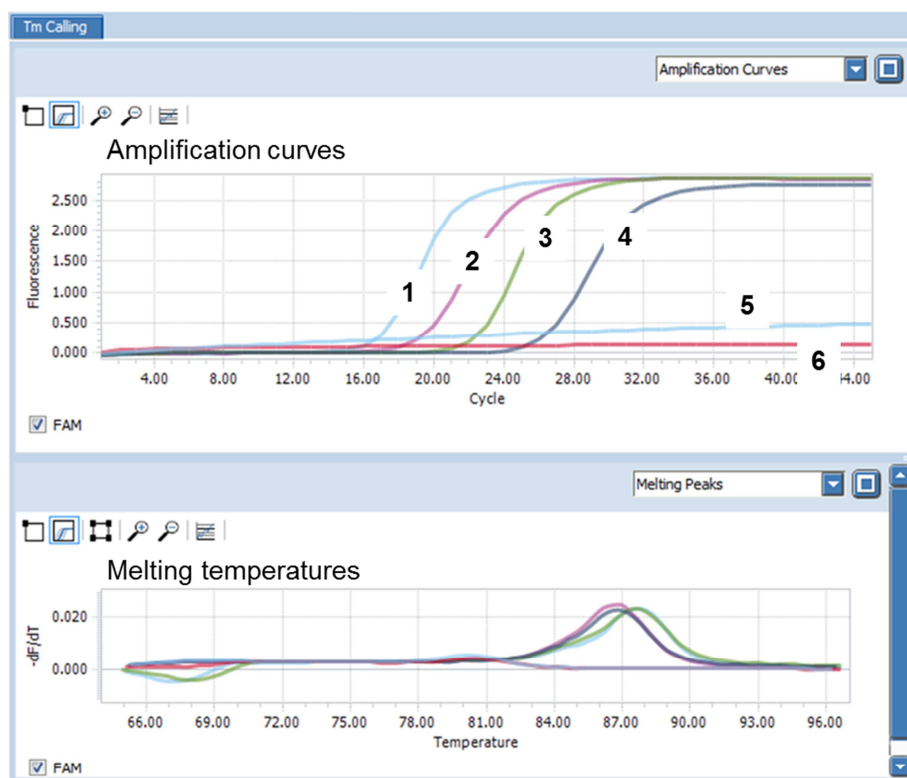

| Sample | MERS-CoV ORF1A RNA         | Bst 2.0 | AMV RT  | Betaine |
|--------|----------------------------|---------|---------|---------|
| 1      | 9 x 10 <sup>8</sup> copies | 8 units | 2 units | 0.4 M   |
| 2      | 9 x 10 <sup>8</sup> copies | 8 units | 2 units | 1 M     |
| 3      | 9 x 10 <sup>8</sup> copies | 8 units | 0       | 0.4 M   |
| 4      | 9 x 10 <sup>8</sup> copies | 8 units | 0       | 1 M     |
| 5      | 0                          | 8 units | 2 units | 1 M     |
| 6      | 0                          | 8 units | 2 units | 0.4 M   |

**Supplementary Figure S4.** Optimization of one-pot RT-LAMP assay for RNA detection using *in vitro* transcribed MERS-CoV target RNA. The primer set ORF1a.55 was used for optimizing the RT-LAMP-mediated amplification of 9 x 10<sup>8</sup> copies of DNase I-treated synthetic ORF1a RNA. RT-LAMP reactions were performed at 65 °C with 3 min incubations per cycle on a LightCycler 96 real-time PCR machine. Amplicon accumulation was measured in real-time as increase in fluorescence of the intercalating dye EvaGreen.
